# Supplementary material for: Time-Varying Effective Population Sizes of Group-Living Small Mammals
Source: MDPI journal article supplement (doi:10.3390/d15121173), 2023-11-24
Supplement: s1 [file s1]

## Supplemental materials

**Table S1.** Model selection of the robust-design closed population models for the estimations of population sizes of Daurian pikas (*Ochotona dauurica*) in Inner Mongolia, China from May 2010 to October 2012. Letter  $K$  denotes the number of unknown parameters and  $w$  is the Akaike weight, Symbol  $p(t,.)$  denotes the probability of initial capture, which was assumed to change over the primary sessions but remain constant within a secondary session;  $\phi(t)$  the estimate of apparent survival;  $c(t,.)$  the probability of recapture, which was assumed to change over the primary sessions but remained constant within a secondary session;  $\gamma'$  the probability of emigration;  $\gamma''$  the probability of immigration;  $N$  population size; and  $t$  the time effect. Markov refers to random temporary emigration and Markov temporary emigration, respectively. Symbol  $AIC_c$  denotes the Akaike information criterion corrected for small population size and  $\Delta AIC_c$  is the difference in  $AIC_c$  between a model and the best model. Deviance is 2 times negative log likelihood value of a model.

| Model                                                                          | $AIC_c$ | $\Delta AIC_c$ | $w$ | $K$ | Deviance |
|--------------------------------------------------------------------------------|---------|----------------|-----|-----|----------|
| $\{\phi(t), p(., t)=c(., t), N(t), \gamma'(.), \gamma''(.)\}$                  | 1037.30 | 0.0            | 1.0 | 60  | 684.93   |
| $\{\phi(t), p(., t)=c(., t), N(t), \gamma'(t), \gamma''(t) \text{ Markov}\}$   | 1053.87 | 16.57          | 0.0 | 70  | 677.72   |
| $\{\phi(t), p(., t)=c(., t), N(t), \gamma'(.)=\gamma''(.)\}$                   | 1056.93 | 19.63          | 0.0 | 59  | 706.90   |
| $\{\phi(t), p(., t)=c(., t), N(t), \gamma'(.)=\gamma''(.)=0\}$                 | 1073.55 | 36.25          | 0.0 | 58  | 725.85   |
| $\{\phi(t), p(., t)=c(., t), N(t), \gamma'(t)=\gamma''(t)\}$                   | 1087.45 | 50.15          | 0.0 | 85  | 674.38   |
| $\{\phi(t), p(., .), c(., .), N(t), \gamma'(.), \gamma''(.)\}$                 | 1097.20 | 59.90          | 0.0 | 59  | 747.17   |
| $\{\phi(t), p(., .)=c(., .), N(t), \gamma'(.), \gamma''(.)\}$                  | 1103.83 | 66.53          | 0.0 | 58  | 756.13   |
| $\{\phi(t), p(., .), c(., .), N(t), \gamma'(.)=\gamma''(.)=0\}$                | 1104.32 | 67.01          | 0.0 | 57  | 758.95   |
| $\{\phi(t), p(., t)=c(., t), N(t), \gamma'(t)=\gamma''(t)\}$                   | 1106.59 | 69.29          | 0.0 | 112 | 622.95   |
| $\{\phi(t), p(., .), c(., .), N(t), \gamma'(.)=\gamma''(.)\}$                  | 1106.65 | 69.34          | 0.0 | 58  | 758.95   |
| $\{\phi(t), p(t, .)=c(t, .), N(t), \gamma'(.), \gamma''(.)\}$                  | 1117.80 | 80.49          | 0.0 | 85  | 704.73   |
| $\{\phi(t), p(., .), c(., .), N(t), \gamma'(t), \gamma''(t) \text{ Markov2}\}$ | 1118.35 | 81.04          | 0.0 | 70  | 742.20   |

|                                                                                     |         |        |     |     |        |
|-------------------------------------------------------------------------------------|---------|--------|-----|-----|--------|
| { $\phi(t)$ , $p(., .)=c(., .)$ , $N(t)$ , $\gamma'(t)$ , $\gamma''(t)$<br>Markov2} | 1120.77 | 83.47  | 0.0 | 68  | 749.43 |
| { $\phi(t)$ , $p(t, .)=c(t, .)$ , $N(t)$ , $\gamma'(t)$ , $\gamma''(t)$ Markov}     | 1126.91 | 89.60  | 0.0 | 92  | 696.07 |
| { $\phi(t)$ , $p(t, .)=c(t, .)$ , $N(t)$ , $\gamma'(.)=\gamma''(.)$ }               | 1134.00 | 96.70  | 0.0 | 84  | 723.44 |
| { $\phi(t)$ , $p(., .)=c(., .)$ , $N(t)$ , $\gamma'(.)=\gamma''(.)=0$ }             | 1135.87 | 98.56  | 0.0 | 56  | 792.82 |
| { $\phi(t)$ , $p(t, .)=c(t, .)$ , $N(t)$ , $\gamma'(.)=\gamma''(.)=0$ }             | 1137.81 | 100.51 | 0.0 | 83  | 729.75 |
| { $\phi(t)$ , $p(., .)$ , $c(., .)$ , $N(t)$ , $\gamma'(t)=\gamma''(t)$ }           | 1145.37 | 108.06 | 0.0 | 84  | 734.81 |
| { $\phi(t)$ , $p(., .)=c(., .)$ , $N(t)$ , $\gamma'(t)=\gamma''(t)$ }               | 1148.26 | 110.96 | 0.0 | 83  | 740.20 |
| { $\phi(t)$ , $p(t, .)=c(t, .)$ , $N(t)$ , $\gamma'(t)=\gamma''(t)$ }               | 1167.35 | 130.04 | 0.0 | 110 | 689.13 |
| { $\phi(t)$ , $p(., .)=c(., .)$ , $N(t)$ , $\gamma'(t)$ , $\gamma''(t)$ }           | 1182.99 | 145.69 | 0.0 | 109 | 707.47 |
| { $\phi(t)$ , $p(., .)$ , $c(., .)$ , $N(t)$ , $\gamma'(t)$ , $\gamma''(t)$ }       | 1184.07 | 146.76 | 0.0 | 110 | 705.85 |
| { $\phi(t)$ , $p(t, .)=c(t, .)$ , $N(t)$ , $\gamma'(t)$ , $\gamma''(t)$ }           | 1206.04 | 168.74 | 0.0 | 137 | 651.87 |
